# Supplementary material for: Solid-supported cross-coupling catalysts derived from homogeneous nickel and palladium coordination complexesElectronic supplementary information (ESI) available: Synthesis of the complexes and crystallographic data for 1 and 2. See http://www.rsc.org/suppdata/dt/b3/b316553c/
Source: Royal Society of Chemistry journal article supplement (doi:10.1039/b316553c), 2004-01-01
Supplement: b316553c.doc [file b316553c.doc]

Solid-supported cross-coupling catalysts derived from homogeneous nickel and palladium coordination complexes

Nam T.S. Phan,*a* David H. Brown,*a* Harry Adams,*b* Sharon E. Spey *b* and Peter Styring**a*

# Supplementary Material

## Synthesis of the complexes

Based on the one-pot procedure reported recently,1 complex **1** was prepared in a stepwise manner. The reaction of 2,4-pentandione with an equimolar amount of 1,2-diaminoethane in CH2Cl2 at room temperature for 10 minutes then subsequent addition of 2,4-dihydroxybenzaldehyde in a mixture of methanol and CH2Cl2 yielded what was thought to be a solution of the unsymmetrical free ligand (Scheme 1). Subsequent addition of nickel acetate tetrahydrate in methanol followed by heating at reflux for 1 hour and then cooling afforded red crystals, which were thought to be complex **1**. However, we discovered that this one-pot method also produced the symmetrical dihydroxysalen complex **5** as a significant contaminant which proved difficult to separate completely from the unsymmetrical complex **1**. The formation of **5** results from the reversible nature of the first reaction in Scheme 1. Condensation of 1,2-diaminoethane and pentan-2,4-dione reaches an equilibrium containing a significant amount of the unreacted diamine. The symmetric *bis*-imine ligand is then formed when the 2,4-dihydroxybenzaldehyde is added. The latter reaction is unavoidable and proceeds without difficulty regardless of the proportions of the two reagents since the reaction of the amine with the aldehyde proceeds more quickly than with the ketone. As a result the possibility of two competing reactions exists in the solution, the condensations of 2,4-dihydroxybenzaldehyde with the half-unit or the free diamine respectively, thereby ultimately yielding the two nickel(II) complexes **1** and **5**. A typical reaction following the original one-pot method affords, after hot methanol recrystallisation, deep-red crystals consisting mostly of **1**, and a substantial quantity of a light-red solid, that is insoluble in hot methanol, that consists mainly of **5**. The molar ratio of the isolated materials **1** and **5** was 3:1 respectively. However, from 1H NMR spectroscopic analysis it was obvious that the recrystallised material, consisting mainly of **1** was contaminated with a large amount of **5**, up to 20% impurity even after recrystallisation. It proved difficult to remove the contaminant **5** from samples of **1** by further recrystallisation. Indeed, the same problem was encountered in earlier publications involving a stepwise synthesis of salen-type ligands containing two different donor units.2

It is obvious that the inherent problem of symmetrical complex contamination can be avoided if the amount of free 1,2-diaminoethane in solution is minimised or eliminated before the addition of 2,4-dihydroxybenzaldehyde for the condensation with the half-unit. Some publications have addressed the problems of the half-unit synthesis. These include the condensation of excess 1,2-diaminoethane with pentan-2,4-dione3 or the condensation of excess 1,2-diaminocyclohexane with salicylaldehyde in chloroform at 0ºC for 5 hours.4 Other reports considered the reaction of equimolar quantities of 2,4-pentandione and 1,2-diamino-2-methylpropane in CH2Cl2 under reflux for 30 minutes.5 The solvent and unreacted starting materials were subsequently removed *in situ* under vacuum at 60ºC. It was found that control of this temperature was critical in order to be sufficient for the removal of reactants, but yet still safe enough to protect the integrity of the reactive half-unit. The half-unit prepared by this procedure is free from unreacted diamines, and was found to be pure enough for the preparation of new unsymmetrical ligands. Bu and co-workers3 recently reported a procedure for the synthesis of unsymmetrical salen-type copper(II) complexes, in a three step process giving the half-unit synthesis in yields of 85-90%, the ligand in yields of 80-84% and the copper(II) complex in yields of 70-87%. This gives an overall yield to the complexes of 48-66%.

Based on the one-pot synthetic method for the unsymmetrical salen-type nickel(II) complex **1**1 and that for the unsymmetrical salen-type copper(II) complex preparation,3 modifications were made to improve the synthetic procedure as well as the purity of the desired unsymmetrical salen-type complexes. 2,4-Pentandione was reacted with excess 1,2-diaminoethane in CH2Cl2 at reflux for 1 hour and then the excess amine was removed by evaporation under vacuum at 60-65ºC. The residue was then reacted with 2,4-dihydroxybenzaldehyde in methanol and CH2Cl2 and the general one-pot procedure was then followed. This new method afforded **1**, after recrystallisation, in 60% yield with a purity of *ca.* 95% (by 1H NMR). Residual **5** could not be removed by further recrystallisation. The modified procedure clearly offers advantages over the two former methods because of the increased purity of the desired product as well as the simple work-up procedure. The problem of the desired product being seriously contaminated with the symmetrical complex can be minimised prior to recrystallisation and the nickel(II) complex can be prepared without separating the procedure into several steps, with their associated intermediate product purifications.

The success in the synthesis of the unsymmetrical salen-type nickel(II) complex inspired us to prepare the analogous palladium complex **2**. Although there are a variety of palladium(II) Schiff base complexes known in the literature, 6-9 there are few examples of salen-type complexes of this metal ion and there are no publications reporting the synthesis of unsymmetrical salen-type palladium(II) complexes based on 1,2-diaminoethane, 2,4-pentandione and 2,4-dihydroxybenzaldehyde. Applying the modified one-pot method with two steps, using palladium acetate as the metal source, gave only an 18% yield of the palladium(II) complex **2**, considerably lower than the 60% yield for the nickel complex following the analogous procedure. It was noticed that a significant amount of black precipitate, presumably palladium black, formed when the reaction mixture was heated under reflux in methanol and CH2Cl2. An alternative synthetic procedure was required.

Recently, there have been some publications describing the synthesis of symmetrical salen palladium(II) complexes, including the sequential treatment of binaphthyl-salen ligands with sodium methoxide and then palladium acetate in methanol, affording analytically pure products in yields of about 70%.10 The procedure was applied to the synthesis of the salenac-OH complex **2**, however, the desired product was only obtained in a yield of 12%.

It was found that by applying the one-pot method described for [Ni(salenac-OH)] (**1**) above, with some modifications, the yield of the palladium(II) complex **2** can be improved. The ligand was prepared *in situ*,as described in the nickel complex preparation, and then a solution of palladium acetate in methanol was added and the resulting solution stirred overnight at *room temperature*. By performing the reaction at room temperature, rather than at reflux, we eliminated the formation of the black powder, suspected to be palladium black. On cooling (0ºC) of the reaction mixture, yellow crystals formed. Recrystallisation of the yellow solid, from hot methanol, affords the palladium complex **2** in 40% yield, a significant improvement from the original 18% yield. Like the nickel complex **1**, complex **2** was also contaminated with low levels (< 5%) of the symmetrical impurity **6**.

1P. Styring, C. Grindon, and C. M. Fisher, *Catal. Lett.*, 2001, **77**, 219.

2P. Pietikainen and A. Haikarainen, *J. Mol. Catal. A: Chem.*, 2002, **180**, 59.

3X. R. Bu, C. R. Jackson, D. V. Derveer, X. Z. You, Q. J. Meng, and R. X. Wang, *Polyhedron*, 1997, **16**, 2991.

4J. Lopez, S. Liang, and X. R. Bu, *Tetrahedron Lett.*, 1998, **39**, 4199.

5J. Costes and M. I. Fernandez-Garcia, *Inorg. Chim. Acta*, 1995, **237**, 57.

6X. Riera, A. Caubet, C. López, V. Moreno, E. Freisinger, M. Willermann, and B. Lippert, *J. Organomet. Chem.*, 2001, **629**, 97.

7J. M. Vila, M. Gayoso, M. T. Pereira, M. López-Torres, J. J. Fernández, A. Fernández, and J. M. Ortigueira, *J. Organomet. Chem.*, 1997, **532**, 171.

8J. M. Vila, M. Gayoso, M. T. Pereira, M. López-Torres, J. J. Fernández, A. Fernández, and J. M. Ortigueira, *J. Organomet. Chem.*, 1996, **506**, 165.

9A. Fernández, J. J. Fernández, M. López-Torres, A. Suárez, J. M. Ortigueira, J. M. Vila, and H. Adams, *J. Organomet. Chem.*, 2000, **612**, 85.

10X. Zhou, J. Huang, X. Yu, Z. Zhou, and C. Che, *J. Chem. Soc., Dalton Trans.*, 2000, 1075.
